# Supplementary material for: Osmotic Stress Responses, Cell Wall Integrity, and Conidiation Are Regulated by a Histidine Kinase Sensor in Trichoderma atroviride
Source: MDPI journal article supplement (doi:10.3390/jof9090939), 2023-09-16
Supplement: s1 [file s1]

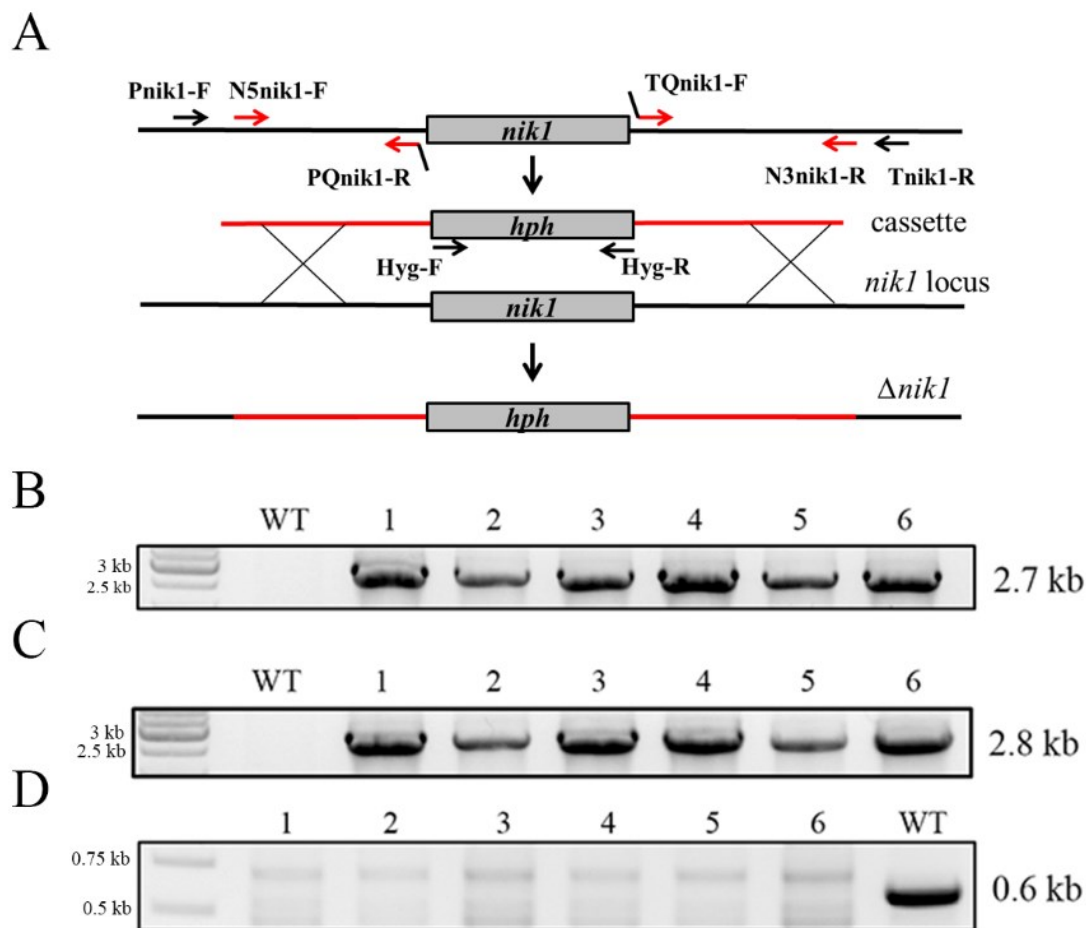

**Figure S1.** Deletion of *nik1* gene. **A.** Schematic diagram of the *nik1* gene replacement by the *hph* selectable marker. **B-D.** PCR to confirm the *nik1* gene replacement in  $\Delta nik1$  strains. Pnik1-F – Hyg-R primers were used to amplify the 5' region - *hph* gene (**B**). Hyg-F – Tnik1-R primers amplified the *hph* - 3' region (**C**). 1nik1-F – 3nik1-F primers amplified a fragment of the *nik1* ORF (**D**).

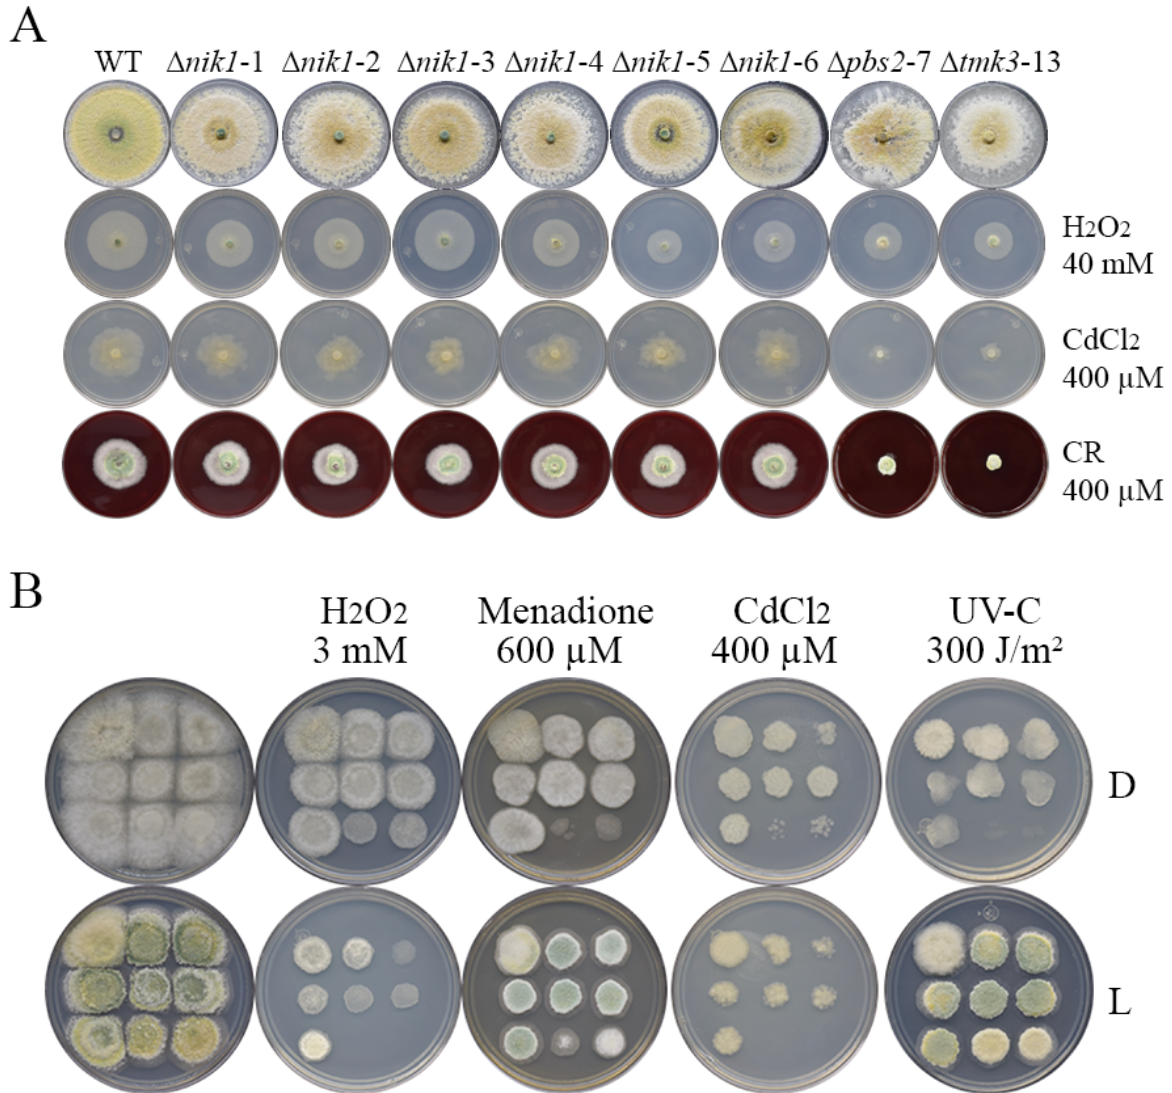

**Figure S2.** Response to oxidative stress, cadmium, and UV-light in  $\Delta nik1$  strains. **A.** Tolerance to oxidative stress, cadmium and Congo red in mycelia of WT,  $\Delta nik1$ ,  $\Delta pbs2$  and  $\Delta tmk3$  strains. H<sub>2</sub>O<sub>2</sub>, CdCl<sub>2</sub> and Congo red were added to PDA media at the indicated concentrations. Strains were incubated at 27°C for four days in constant white-light and pictures were taken. **B.** Tolerance to oxidative stress, cadmium and UV-light in conidia of WT,  $\Delta nik1$ ,  $\Delta pbs2$  and  $\Delta tmk3$  strains. Drops of 500 conidia were inoculated of the following strains (top-left to bottom-right): WT,  $\Delta nik1-1$ , -2, -3, -4, -5, -6,  $\Delta pbs2-7$ , and  $\Delta tmk3-13$ . Strains were incubated at 27°C for four days in darkness (D) or constant white-light (L) and pictures were taken. A Stratalinker 2400 UV Crosslinker was used to emit UV irradiation. Assays were performed in triplicate.

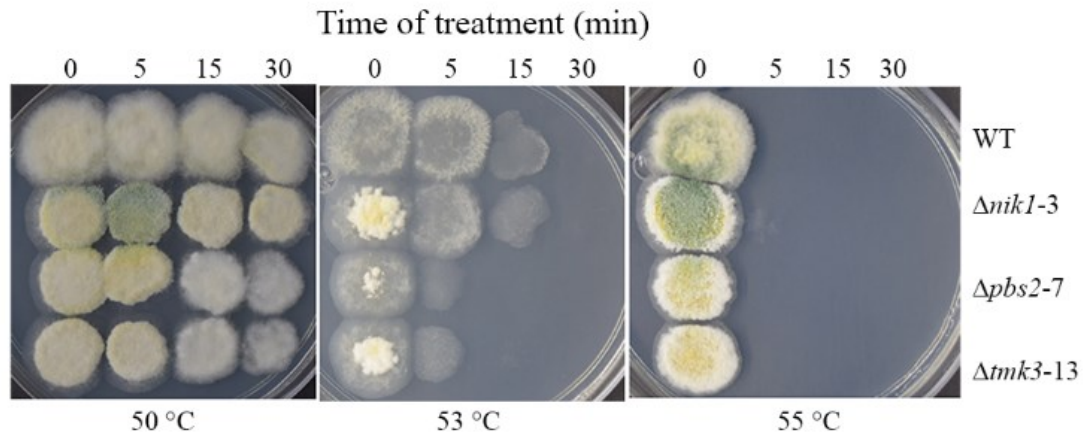

**Figure S3.** Thermal-shock resistance in  $\Delta nik1$  strains. A conidial suspension ( $100 \text{ conidia } \mu\text{l}^{-1}$ ) of WT,  $\Delta nik1-3$ ,  $\Delta pbs2-7$ , and  $\Delta tmk3-13$  strains was incubated in a Thermoblock at the indicated temperature during the indicated times. Then, drops of 500 conidia were inoculated on PDA plates plus Triton X-100 0.5 % and incubated at 27 °C by 4 days, and pictures were taken. The assay was performed in triplicate.

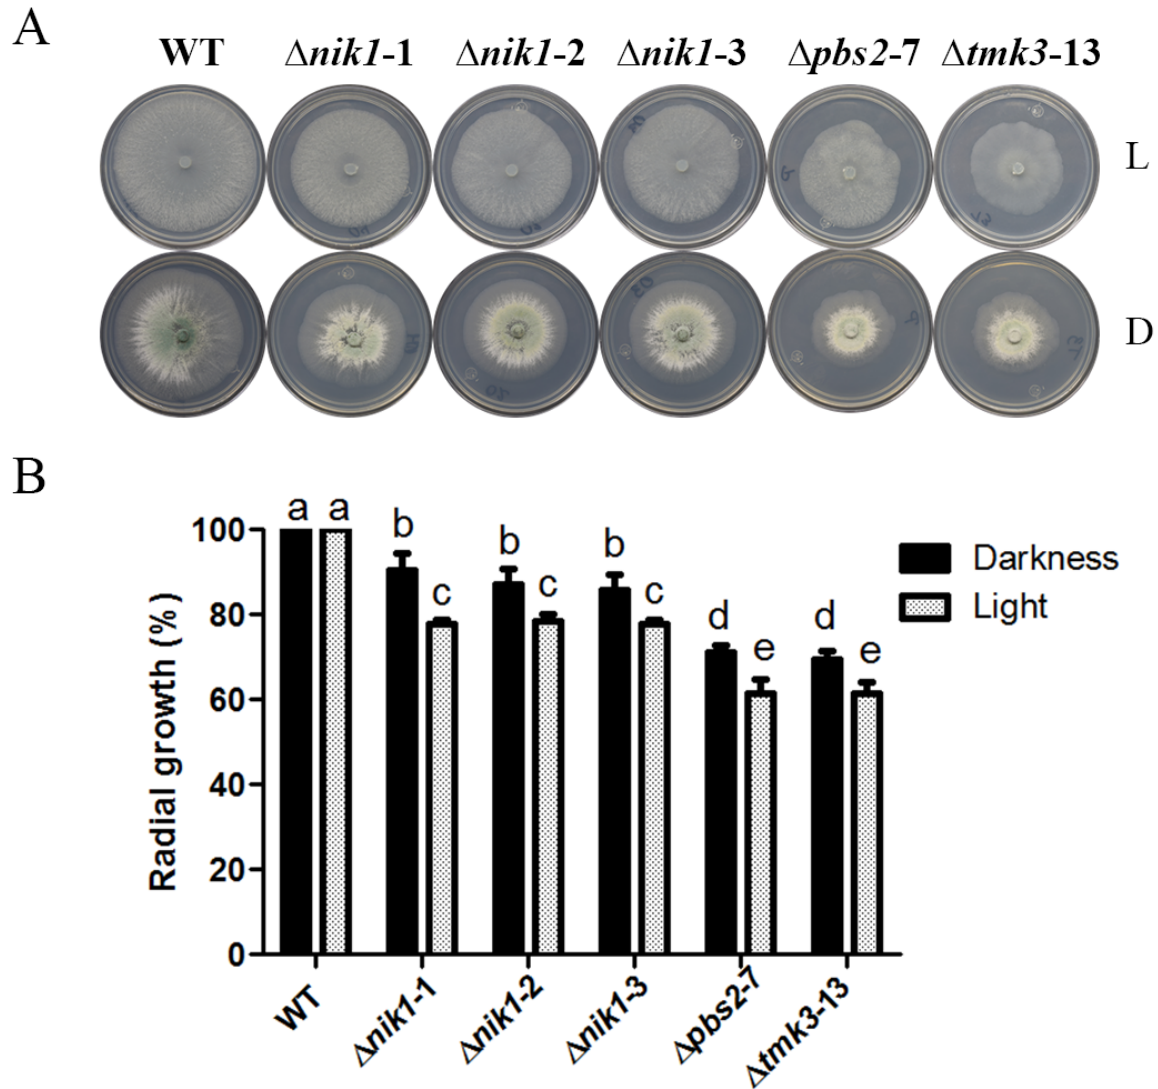

**Figure S4.** Radial growth of  $\Delta nik1$  strains. **A.** WT,  $\Delta nik1$ ,  $\Delta pbs2$  and  $\Delta tmk3$  strains were inoculated on PDA plates at 27°C for 48 h in constant white-light (L) or darkness (D). **B.** After 48 h, pictures were taken and radial growth was measured in triplicate using the Image J software (version 1.52a). The graph shows the averages  $\pm$  the standard deviation of three independent experiments, and analyzed with the Tukey-Kramer method ( $\alpha=0.05$ ). Different letters on the bars represent significant differences.

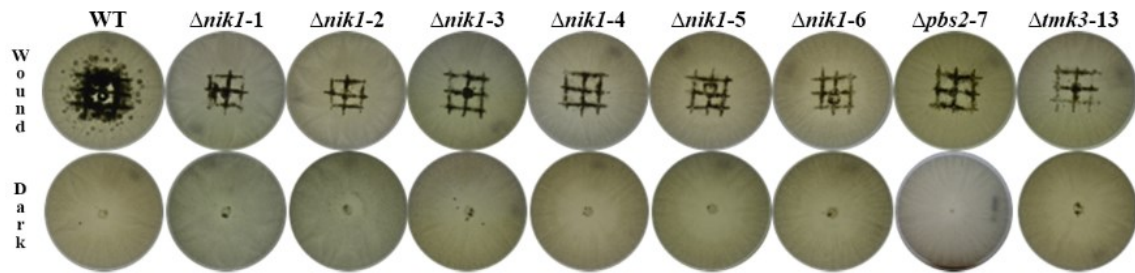

**Figure S5.** Wound response assay in *Δnik1* strains. Mycelial plugs of the indicated strains were inoculated on PDA plates and incubated at 27°C in darkness. After 48 h, mycelia of the WT and mutant strains were damaged with a sterile scalpel performing six cuts (Wound), incubated for an additional 48 h in the dark, and pictures were taken. Strains maintained in complete darkness (Dark) were used as control.
